# Supplementary material for: Out-of-distribution evaluation of active learning pipelines for molecular property prediction
Source: Royal Society of Chemistry journal article supplement (doi:10.1039/d5ra08055j), 2026-01-01
Supplement: d5ra08055j1.pdf [file d5ra08055j1.pdf]

## Appendix

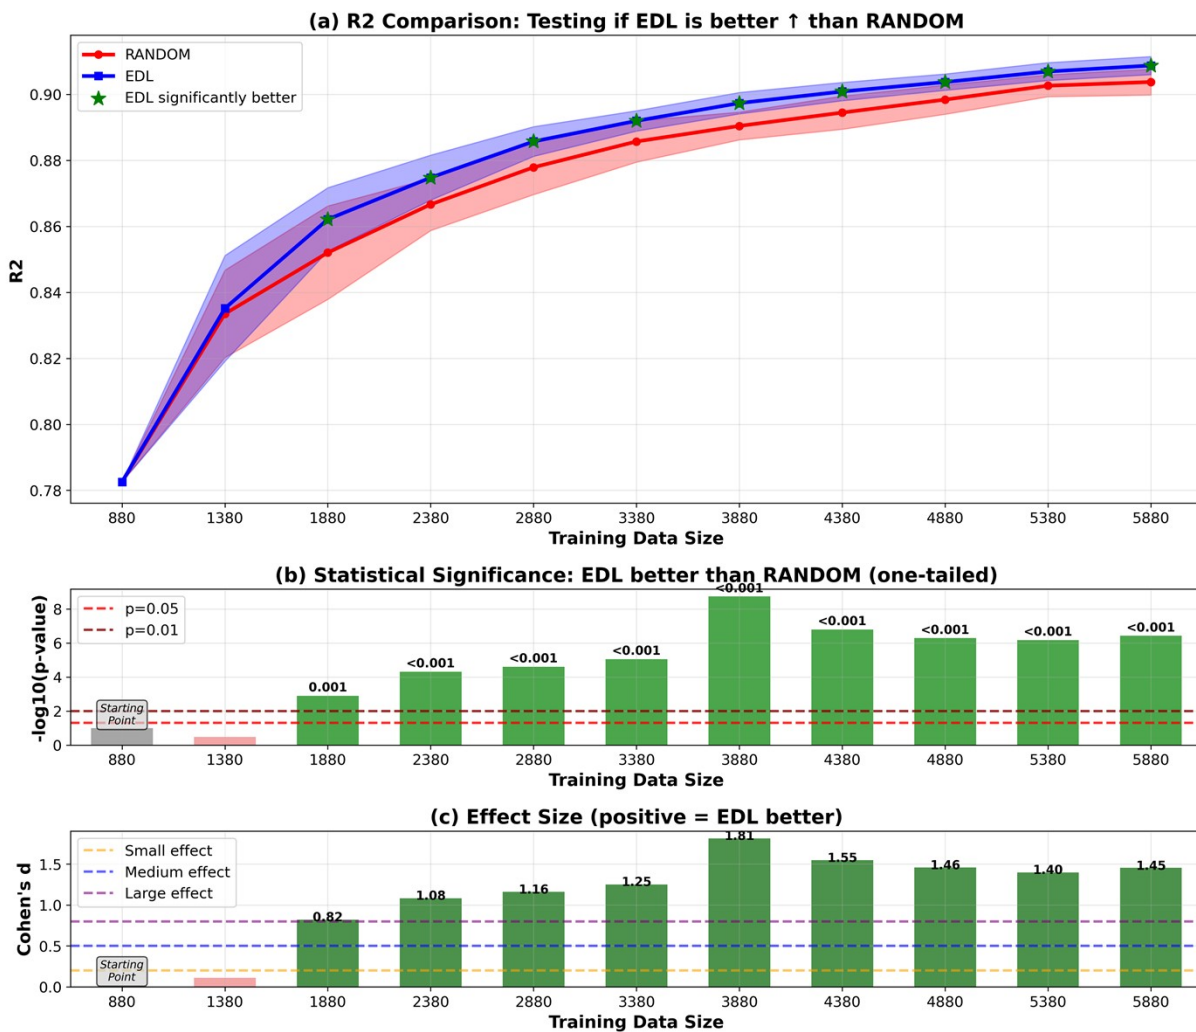

Figure A1. R<sup>2</sup> results of EDL compared with random sampling within the SOMAS dataset. Each iteration adds 500 samples.

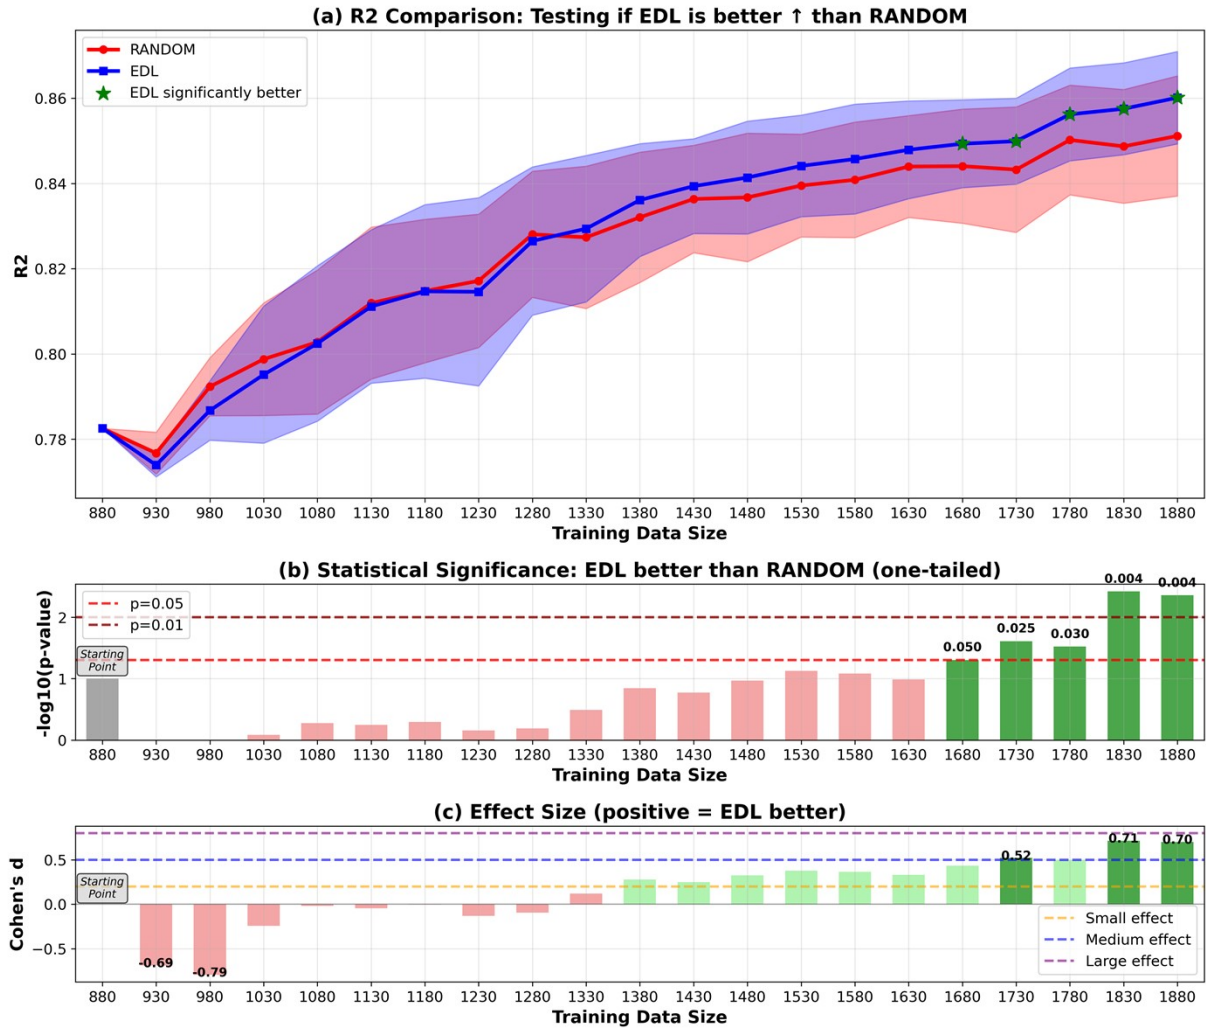

Figure A2. R<sup>2</sup> results of EDL compared with random sampling within the SOMAS dataset. Each step adding 50 samples.

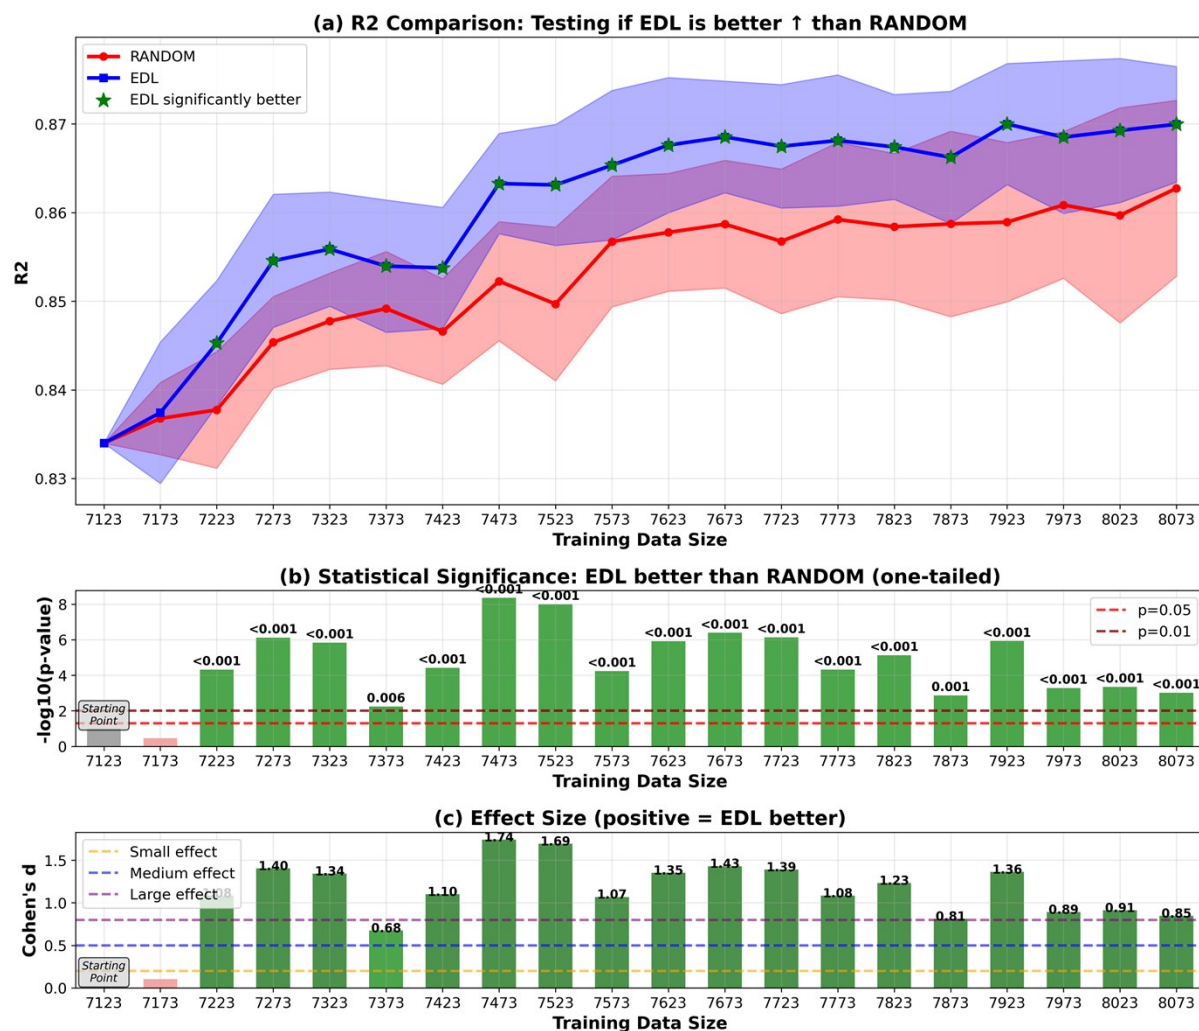

Figure A3. R<sup>2</sup> results of EDL compared with random sampling, starting with the SOMAS dataset and generalizing to the PubChem dataset. Each iteration adds 50 samples.

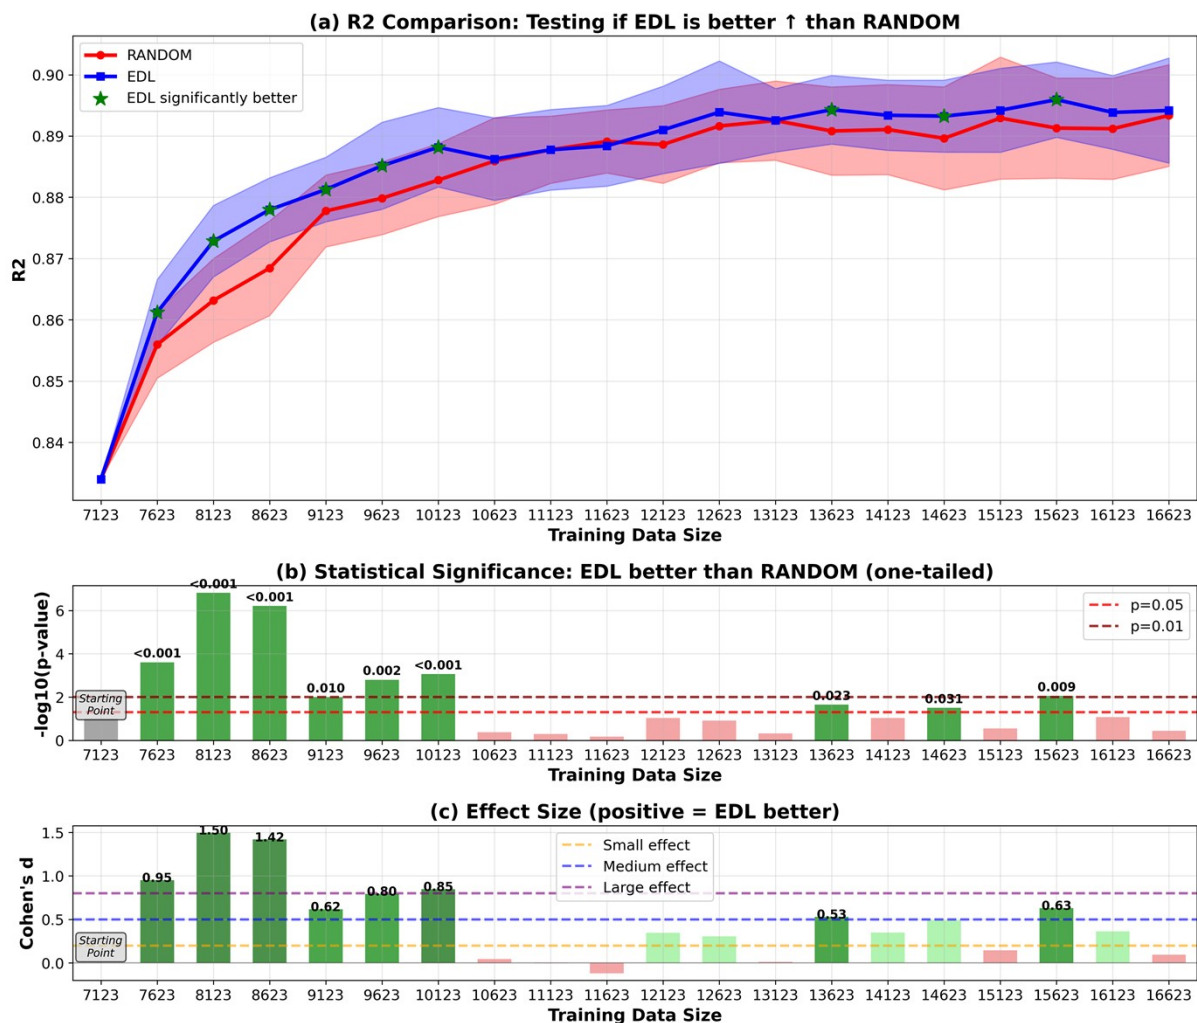

Figure A4. R<sup>2</sup> results of EDL compared with random sampling, starting with the SOMAS dataset and generalizing to the PubChem dataset. Each iteration adds 500 samples.

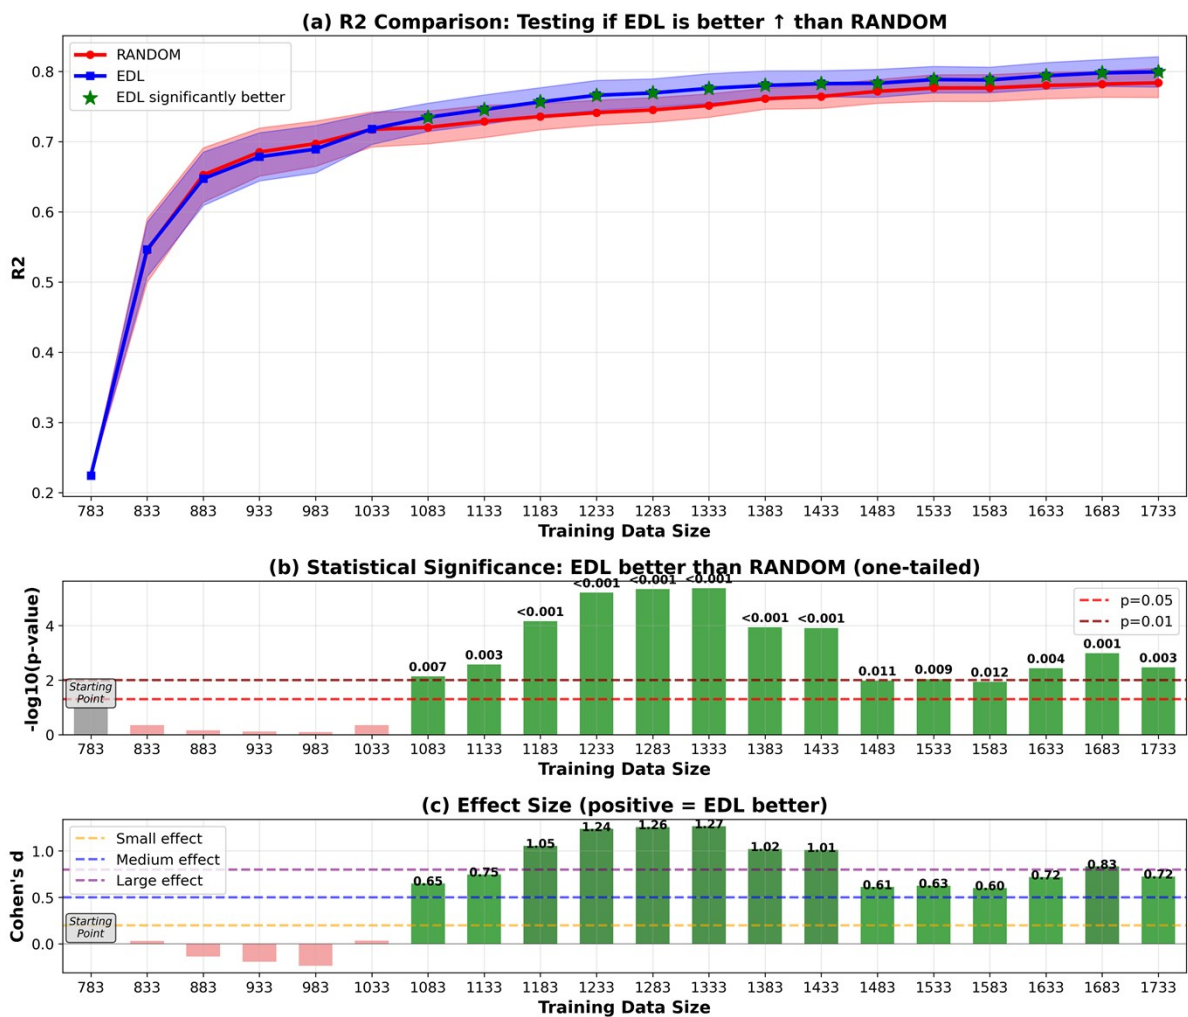

Figure A5. R<sup>2</sup> results of EDL compared with random sampling, starting with the CHO subset from SOMAS and generalizing to the PubChem dataset. Each step adding 50 samples.

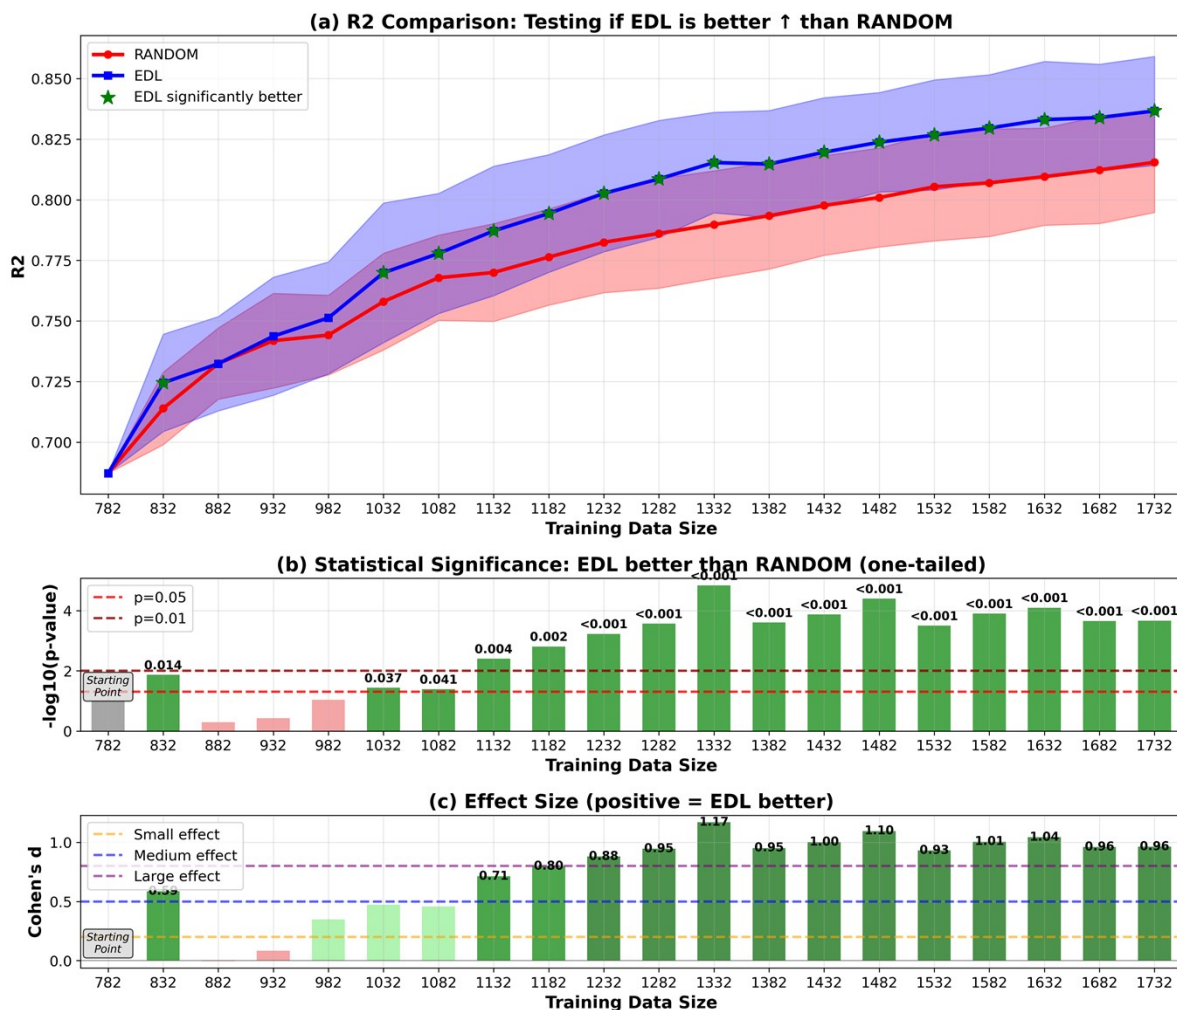

Figure A6. R<sup>2</sup> results of EDL compared with random sampling, starting with a matched-size random subset from SOMAS and generalizing to the PubChem dataset. Each iteration adds 50 samples.



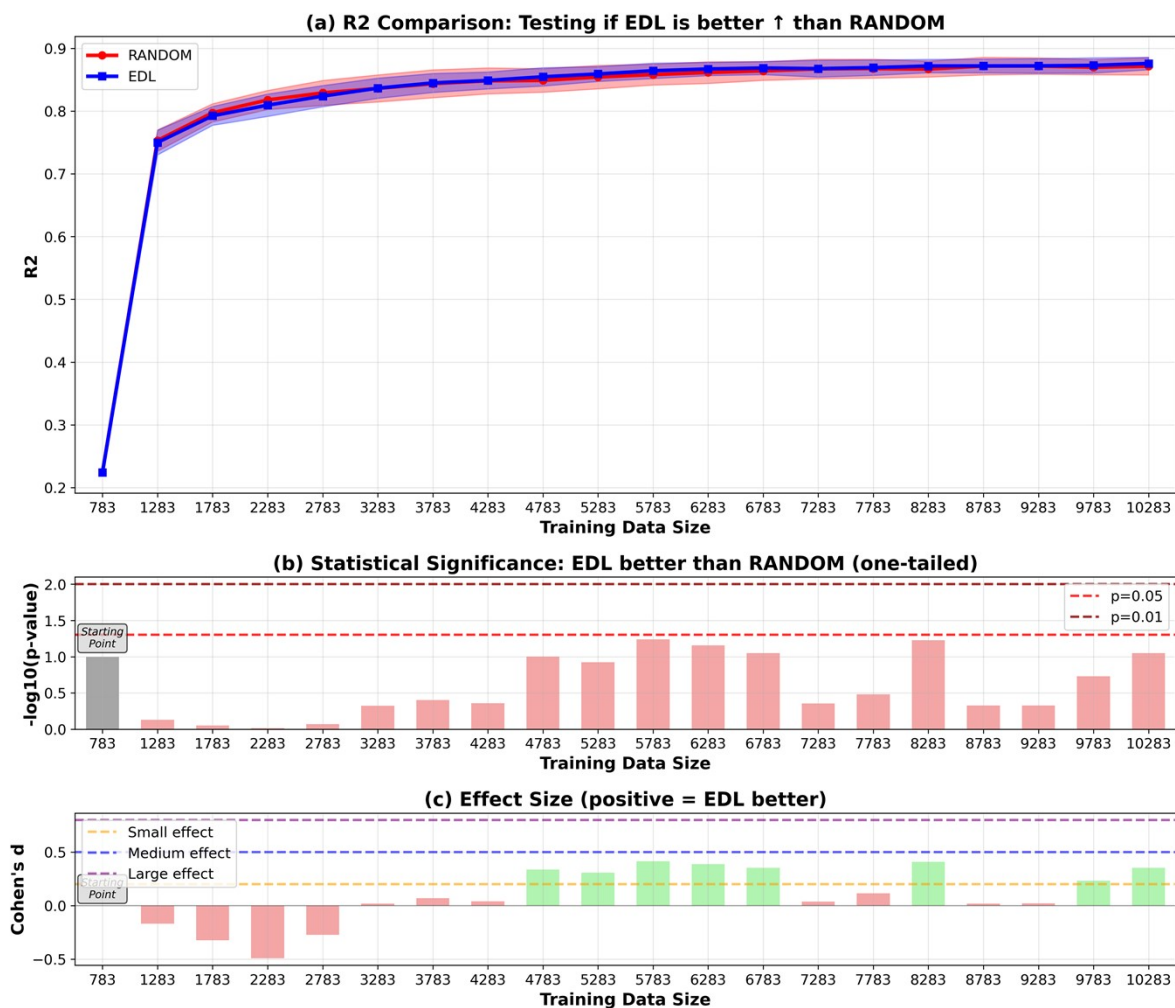

Figure A7. R<sup>2</sup> results of EDL compared with random sampling, starting with the CHO subset from SOMAS and generalizing to the PubChem dataset. Each iteration adds 500 samples.

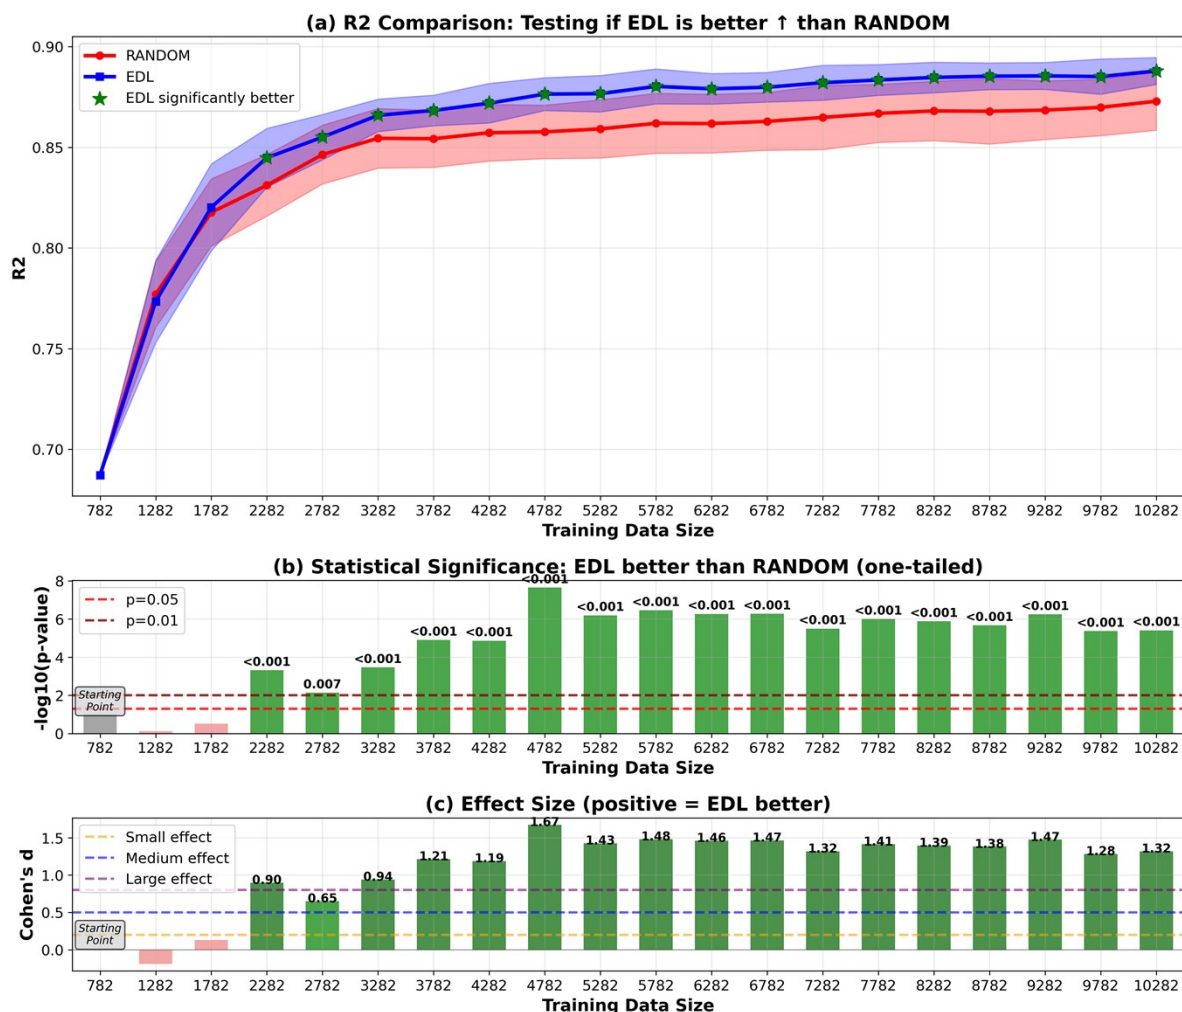

Figure A8. R<sup>2</sup> results of EDL compared with random sampling, starting with a matched-size random subset from SOMAS and generalizing to the PubChem dataset. Each iteration adds 500 samples.
